# Supplementary material for: Mapping age and basal conditions of ice in the Dome Fuji region, Antarctica, by combining radar internal layer stratigraphy and flow modeling
Source: Copernicus journal article supplement (doi:10.5194/tc-2023-35), 2023-03-16
Supplement: Supplementary file 1 [file tc-2023-35-supplement.pdf]

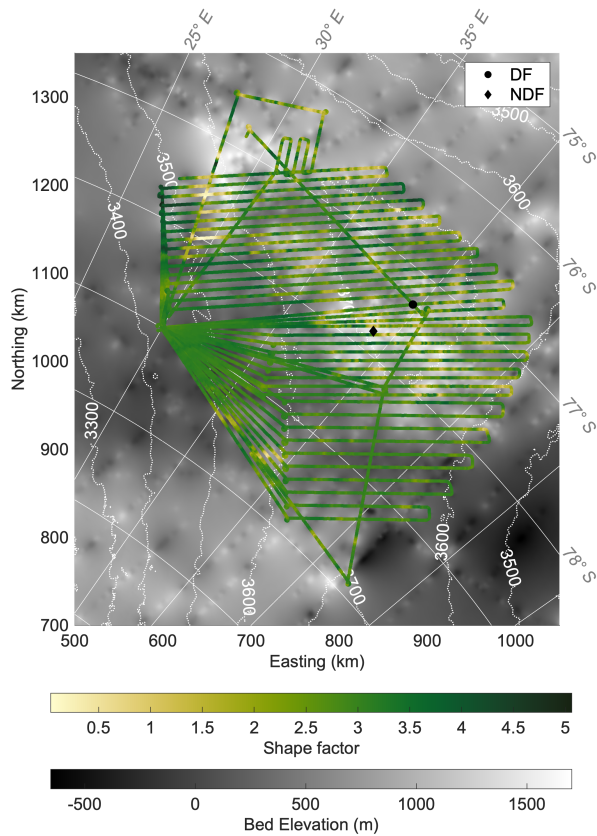

**Figure S1.** Shape factor along the profiles of the radar survey in the DF region. The shape factor at the DF drill site and the NDF are interpolated as 3.1 and 2.2, respectively.

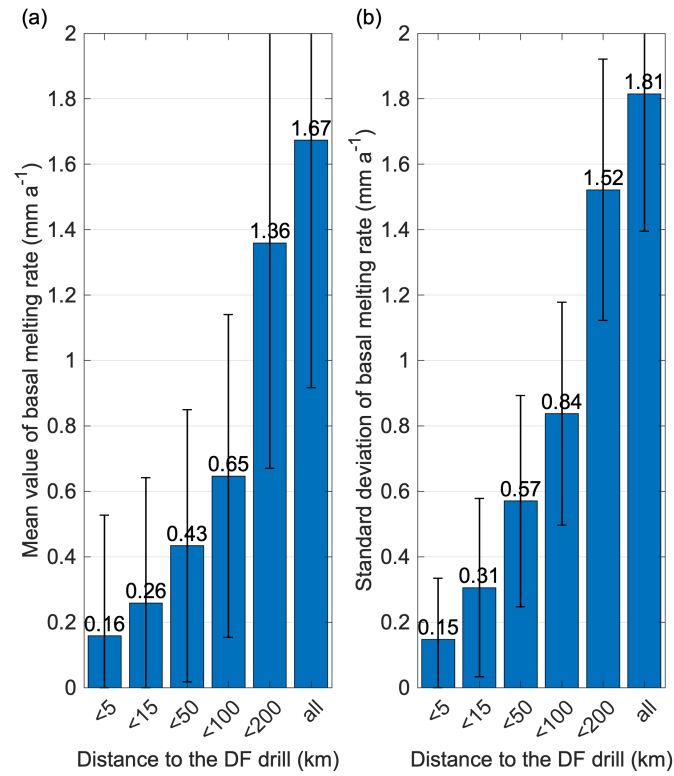

**Figure S2.** (a) Spatial mean value and (b) spatial standard deviation of deduced basal melt rates within 5, 15, 50, 200 km to the DF drill site. Error bars show corresponding mean value and spatial standard deviation of uncertainties of basal melt rates, which are output together with melt rates from the model. The last bar “all” represents the whole study area.

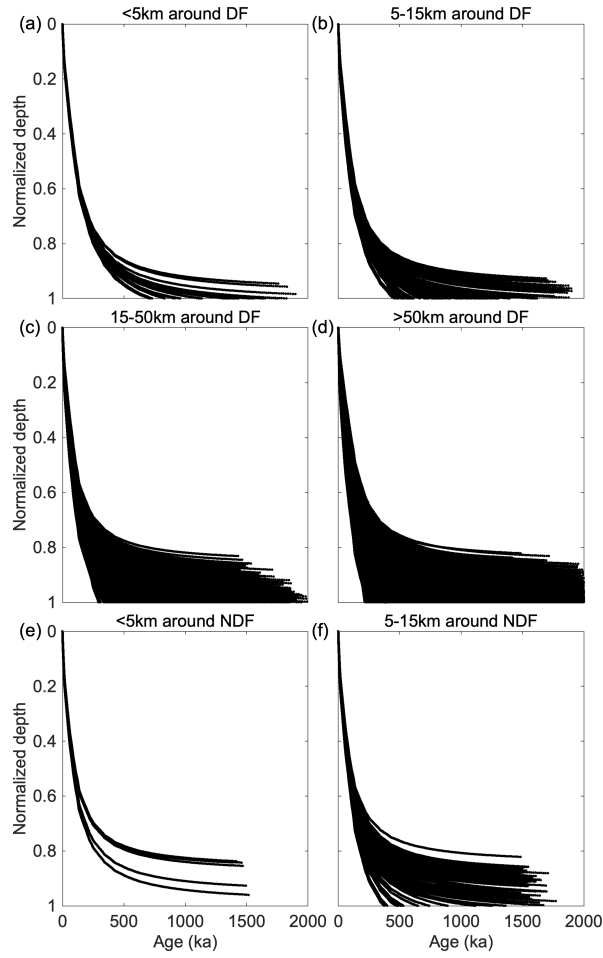

**Figure S3.** Vertically normalized age–depth distribution in ranges (a) < 5, (b) 5–15, (c) 15–50, (d) > 50 km around DF and (e) < 5, (f) 5–15 km around NDF. The distributions in ranges 15–50 km and > 50 km around NDF have similar shapes to those around DF. It shows the relation between age and normalized depth (0 on surface and 1 at ice-bed interface) in different areas around DF and NDF, respectively. By normalization we remove in principle the effect of varying ice thickness, as internal layers (and thus age) follows the bed topography to a first degree. The normalized age–depth distributions 5 km and 5–15 km around DF and NDF show less spreading in age compared with those farther away.

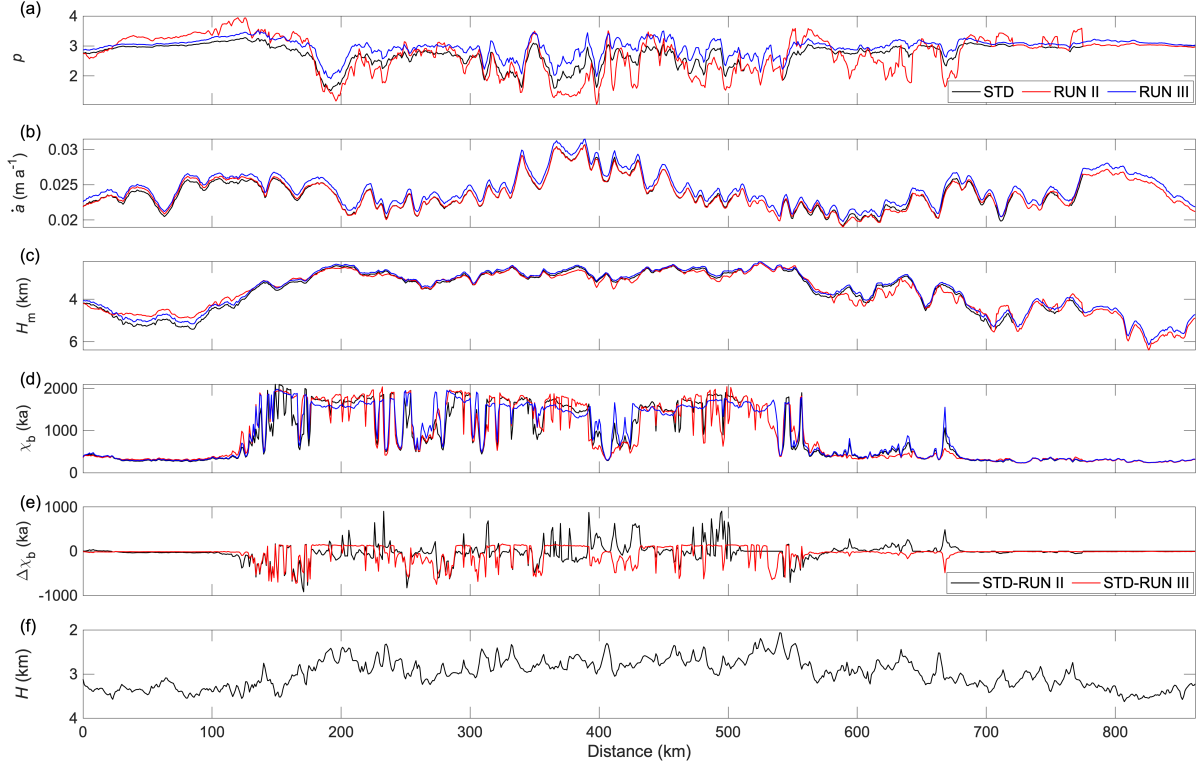

**Figure S4.** Comparison of (a) shape factor  $p$ , (b) accumulation rate  $\dot{a}$ , (c) mechanical ice thickness  $H_m$ , (d) age of basal ice  $\chi_b$  between three runs, black line, red line and blue line show the modeling result of runs STD, II and III, respectively. (e) The difference of age of basal ice  $\delta\chi_b$  between STD and RUN II (in black line), and between STD and RUN III (in red line). (f) Ice thickness  $H$  observed from radar system (Karlsson et al., 2018). An overlap between STD and RUN II implies that there is no additional information of the EH8 in those areas (514–543 km, 644–650 km, 705–708 km, 722–744 km, 757–765 km and 776–863 km), which means two runs are totally the same there and return same results. We find that difference of the shape factor (Fig. S4a) between STD and RUN II are relatively significant along the profile, especially at the distance from  $\sim 0$  km to  $\sim 120$  km, and from  $\sim 590$  km to  $\sim 780$  km (exclude the overlap areas). While STD and RUN III basically keep a similar difference in the whole profile and the shape factor of STD stays smaller than in RUN III. The difference of accumulation rates between STD and RUN III has a similar value of  $\sim 0.0007$  at each point along the profile, while the difference between STD and RUN II is negligible (Fig. S4b). The difference of mechanical ice thickness between STD and RUN II/RUN III are larger from 0 to 110 km, and from 580 to 710 km. In other places, the difference is tiny (Fig. S4c). From 580 to 700 km, we can observe a more turbulent difference between STD and RUN II than RUN III. The age of basal ice at different points along the profile has a notable difference (Fig. S4d). For clarity we show the difference additionally between each two model runs in Fig. S4e. Occasional peaks of STD-RUN III, e.g. at distance of  $\sim 150$  km,  $\sim 170$  km and  $\sim 530$  km, reach a difference of up to  $\sim 800$  ka. The differences between STD and RUN II is larger, up to  $\sim 920$  ka at  $\sim 250$  km, where EH8 was not traced the difference is 0. We find the peaks of difference between STD and RUN III/RUN II can be often observed at the same places, e.g.  $\sim 150$  km,  $\sim 250$  km,  $\sim 490$  km, together with peaks of bed topography (Fig. S4f), which implies that the topography is an important factor for age.

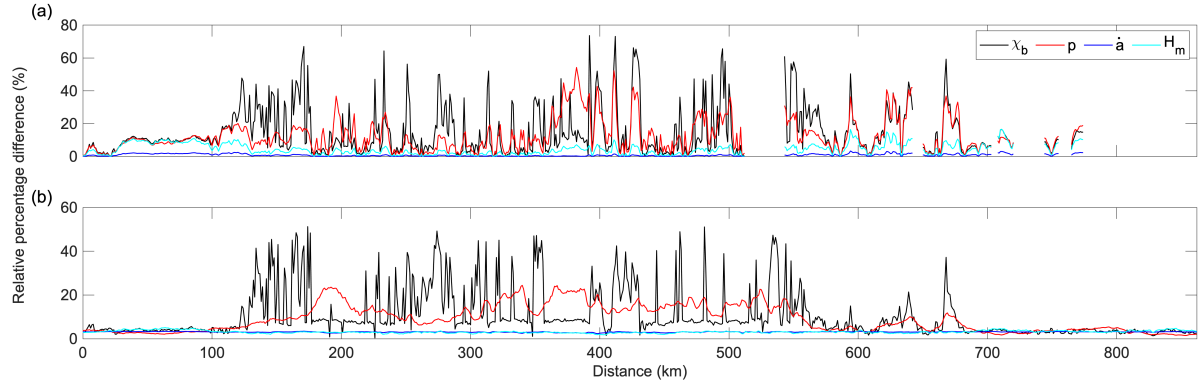

**Figure S5.** Relative percentage difference of the accumulation rate  $\dot{a}$ , the shape factor  $p$ , the mechanical ice thickness  $H_m$  and the age of basal ice  $\chi_b$  between (a) STD and RUN II, (b) STD and RUN III. We find that at many points the relative percentage difference of the shape factor and the age of the basal ice fluctuate simultaneously, e.g., from 0 to 100 km in Fig. S5a. But this synchrony doesn't always happens, e.g. from 140 km to 150 km in Fig. S5a, and from 350 km to 400 km in Fig. S5b. The fluctuations of relative percentage difference of the accumulation rate in both scenarios are tiny along the profile. The relative percentage difference of mechanical ice thickness between STD and RUN II basically follow the change of relative percentage difference of the shape factor, but with a much lower value.
